# Supplementary material
Source: PubMed Central journal article supplement (PMC6309605)
Supplement: NIHMS1510203-supplement-4.pdf [file NIHMS1510203-supplement-4.pdf]

| phenotype | poag_locus | gene      | sentinel_snp |
|-----------|------------|-----------|--------------|
| POAG      | TGFBR3     | TGFBR3    |              |
| POAG      | TGFBR3     | TGFBR3    |              |
| POAG      | TGFBR3     | TGFBR3    |              |
| POAG      | TGFBR3     | TGFBR3    | 1            |
| severity  | TGFBR3     | TGFBR3    | 1            |
| POAG      | TMCO1      | LOC440700 |              |
| POAG      | TMCO1      |           |              |
| POAG      | TMCO1      |           | 1            |
| severity  | TMCO1      | TMCO1     | 1            |
| POAG      | TMCO1      |           |              |
| POAG      | TMCO1      |           |              |
| POAG      | TMCO1      |           |              |
| severity  | TMCO1      |           |              |
| POAG      | TMCO1      | TMCO1     | 1            |
| severity  | TMCO1      | TMCO1     | 1            |
| POAG      | TMCO1      | TMCO1     |              |
| severity  | TMCO1      | TMCO1     |              |
| POAG      | TMCO1      | TMCO1     |              |
| POAG      | TMCO1      | TMCO1     |              |
| severity  | TMCO1      | TMCO1     |              |
| POAG      | TMCO1      | TMCO1     |              |
| POAG      | TMCO1      | TMCO1     |              |
| POAG      | TMCO1      | TMCO1     | 1            |
| severity  | TMCO1      | TMCO1     | 1            |
| POAG      | TMCO1      | TMCO1     |              |
| severity  | TMCO1      | TMCO1     |              |
| POAG      | TMCO1      | TMCO1     |              |
| POAG      | TMCO1      | TMCO1     |              |
| severity  | TMCO1      | TMCO1     |              |
| POAG      | TMCO1      | TMCO1     |              |
| POAG      | TMCO1      | TMCO1     | 1            |
| severity  | TMCO1      | TMCO1     | 1            |
| POAG      | TMCO1      | TMCO1     |              |
| severity  | TMCO1      | TMCO1     |              |
| POAG      | TMCO1      | TMCO1     |              |
| POAG      | TMCO1      | TMCO1     |              |

|          |        |                                 |   |
|----------|--------|---------------------------------|---|
| POAG     | TMCO1  | TMCO1                           |   |
| severity | TMCO1  | TMCO1                           |   |
| POAG     | TMCO1  | TMCO1                           |   |
| severity | TMCO1  | TMCO1                           |   |
| POAG     | TMCO1  | TMCO1                           |   |
| severity | TMCO1  | TMCO1                           |   |
| POAG     | TMCO1  | TMCO1                           |   |
| severity | TMCO1  | TMCO1                           |   |
| POAG     | TMCO1  | TMCO1                           |   |
| severity | TMCO1  | TMCO1                           |   |
| POAG     | TMCO1  | TMCO1                           |   |
| severity | TMCO1  | TMCO1                           |   |
| POAG     | TMCO1  | TMCO1                           |   |
| severity | TMCO1  | TMCO1                           |   |
| POAG     | TMCO1  | TMCO1                           |   |
| severity | TMCO1  | TMCO1                           |   |
| POAG     | TMCO1  | TMCO1                           |   |
| severity | TMCO1  | TMCO1                           |   |
| POAG     | TMCO1  | LOC100147773,RP11-466F5.8,TMCO1 |   |
| severity | TMCO1  | LOC100147773,RP11-466F5.8,TMCO1 |   |
| POAG     | TMCO1  | LOC100147773,RP11-466F!         | 1 |
| severity | TMCO1  | TMCO1                           | 1 |
| POAG     | TMCO1  | LOC100147773,RP11-466F5.8,TMCO1 |   |
| severity | TMCO1  | LOC100147773,RP11-466F5.8,TMCO1 |   |
| POAG     | TMCO1  | LOC100147773,RP11-466F5.8,TMCO1 |   |
| severity | TMCO1  | LOC100147773,RP11-466F5.8,TMCO1 |   |
| POAG     | MYOC   | PRRC2C                          |   |
| POAG     | MYOC   | PRRC2C                          |   |
| POAG     | MYOC   | PRRC2C                          |   |
| POAG     | MYOC   |                                 |   |
| POAG     | MYOC   | PRRC2C                          |   |
| POAG     | MYOC   |                                 |   |
| POAG     | CYP1B1 | RMDN2,RMDN2-AS1                 |   |
| POAG     | CYP1B1 |                                 |   |
| POAG     | CYP1B1 |                                 |   |
| POAG     | CYP1B1 | CYP1B1-AS1                      |   |
| POAG     | CYP1B1 | CYP1B1-AS1                      |   |
| POAG     | CYP1B1 | CYP1B1-AS1                      |   |
| POAG     | FNDC3B | FNDC3B                          |   |
| POAG     | FNDC3B | FNDC3B                          |   |

|          |        |        |   |
|----------|--------|--------|---|
| POAG     | FNDC3B | FNDC3B |   |
| POAG     | FNDC3B | FNDC3B |   |
| severity | FNDC3B | FNDC3B |   |
| POAG     | FNDC3B | FNDC3B |   |
| POAG     | FNDC3B | FNDC3B |   |
| severity | FNDC3B | FNDC3B |   |
| POAG     | FNDC3B | FNDC3B |   |
| severity | FNDC3B | FNDC3B |   |
| severity | FNDC3B | FNDC3B |   |
| severity | FNDC3B | FNDC3B |   |
| POAG     | FNDC3B | FNDC3B |   |
| severity | FNDC3B | FNDC3B |   |
| severity | FNDC3B | FNDC3B |   |
| POAG     | FNDC3B | FNDC3B |   |
| severity | FNDC3B | FNDC3B |   |
| POAG     | FNDC3B | FNDC3B |   |
| severity | FNDC3B | FNDC3B |   |
| POAG     | FNDC3B | FNDC3B | 1 |
| severity | FNDC3B | FNDC3B | 1 |
| POAG     | FNDC3B | GHSR   |   |
| severity | AFAP1  | SORCS2 |   |
| POAG     | AFAP1  | AFAP1  |   |
| severity | AFAP1  | AFAP1  |   |
| POAG     | AFAP1  | AFAP1  |   |
| severity | AFAP1  | AFAP1  |   |
| POAG     | AFAP1  | AFAP1  |   |
| POAG     | AFAP1  | AFAP1  | 1 |
| severity | AFAP1  | AFAP1  | 1 |
| POAG     | AFAP1  | AFAP1  | 1 |
| severity | AFAP1  | AFAP1  | 1 |
| POAG     | AFAP1  | AFAP1  | 1 |
| severity | AFAP1  | AFAP1  | 1 |
| POAG     | AFAP1  | AFAP1  |   |
| POAG     | PITX2  | ENPEP  |   |
| POAG     | PITX2  | ENPEP  |   |

|          |        |                     |   |
|----------|--------|---------------------|---|
| POAG     | PITX2  |                     |   |
| POAG     | PITX2  | PITX2               |   |
| POAG     | GMDS   |                     | 1 |
| severity | GMDS   |                     | 1 |
| severity | GMDS   |                     |   |
| POAG     | GMDS   | FOXCUT,LOC101927703 | 1 |
| severity | GMDS   | FOXCUT,LOC101927703 | 1 |
| POAG     | GMDS   | GMDS                | 1 |
| severity | GMDS   | GMDS                | 1 |
| POAG     | GMDS   | GMDS                | 1 |
| severity | GMDS   | GMDS                | 1 |
| POAG     | GMDS   | GMDS-AS1            | 1 |
| severity | GMDS   | GMDS-AS1            | 1 |
| POAG     | GMDS   | GMDS-AS1            |   |
| POAG     | CAV1   |                     | 1 |
| severity | CAV1   |                     | 1 |
| POAG     | CAV1   |                     | 1 |
| severity | CAV1   |                     | 1 |
| POAG     | CAV1   |                     | 1 |
| severity | CAV1   |                     | 1 |
| POAG     | CAV1   |                     | 1 |
| severity | CAV1   |                     | 1 |
| POAG     | CAV1   | CAV1                | 1 |
| severity | CAV1   | CAV1                | 1 |
| POAG     | MIR182 | MIR182              | 1 |
| severity | MIR182 | MIR182              | 1 |
| POAG     | MIR182 |                     |   |
| severity | MIR182 | UBE2H               |   |
| severity | MIR182 | UBE2H               |   |
| POAG     | 8q22   |                     |   |
| POAG     | 8q22   |                     | 1 |
| severity | 8q22   |                     | 1 |
| POAG     | 8q22   |                     | 1 |
| severity | 8q22   |                     | 1 |
| severity | 9p21   | CDKN2A              |   |
| severity | 9p21   | CDKN2A              |   |
| POAG     | 9p21   | CDKN2B,CDKN2B-AS1   | 1 |
| severity | 9p21   | CDKN2B,CDKN2B-AS1   | 1 |
| POAG     | 9p21   | CDKN2B,CDKN2B-AS1   |   |
| severity | 9p21   |                     |   |
| POAG     | 9p21   | CDKN2B-AS1          |   |
| POAG     | 9p21   | CDKN2B-AS1          | 1 |
| severity | 9p21   | CDKN2B-AS1          | 1 |
| POAG     | 9p21   | CDKN2B-AS1          |   |

|          |        |            |   |
|----------|--------|------------|---|
| POAG     | 9p21   | CDKN2B-AS1 |   |
| severity | 9p21   | CDKN2B-AS1 |   |
| POAG     | 9p21   | CDKN2B-AS1 | 1 |
| severity | 9p21   | CDKN2B-AS1 | 1 |
| POAG     | 9p21   | CDKN2B-AS1 | 1 |
| severity | 9p21   | CDKN2B-AS1 | 1 |
| POAG     | 9p21   |            |   |
| severity | 9p21   |            |   |
| POAG     | 9p21   |            |   |
| severity | 9p21   |            |   |
| POAG     | 9p21   |            |   |
| severity | 9p21   |            |   |
| POAG     | 9p21   |            |   |
| severity | 9p21   |            |   |
| POAG     | 9p21   |            |   |
| severity | 9p21   |            |   |
| POAG     | 9p21   |            |   |
| severity | 9p21   |            |   |
| POAG     | 9p21   |            |   |
| severity | 9p21   |            |   |
| POAG     | ABCA1  |            | 1 |
| severity | ABCA1  |            | 1 |
| POAG     | ABCA1  |            | 1 |
| severity | ABCA1  |            | 1 |
| POAG     | ABO    |            |   |
| POAG     | ABO    | ABO        |   |
| POAG     | ABO    |            |   |
| POAG     | ABO    |            |   |
| severity | ABO    |            |   |
| POAG     | ABO    |            |   |
| POAG     | ABO    |            |   |
| POAG     | ABO    | SURF6      |   |
| severity | ABO    | SURF6      |   |
| POAG     | COL5A1 |            |   |
| POAG     | COL5A1 |            |   |
| severity | COL5A1 |            |   |
| POAG     | OPTN   | OPTN       | 1 |

|          |        |       |   |
|----------|--------|-------|---|
| severity | OPTN   | OPTN  | 1 |
| POAG     | ATOH7  |       | 1 |
| severity | ATOH7  |       | 1 |
| POAG     | SIX6   |       | 1 |
| severity | SIX6   |       | 1 |
| POAG     | SIX6   |       | 1 |
| severity | SIX6   |       | 1 |
| POAG     | LTBP2  | AREL1 |   |
| POAG     | LTBP2  | AREL1 |   |
| POAG     | LTBP2  | AREL1 |   |
| POAG     | LTBP2  |       |   |
| POAG     | LTBP2  | FCF1  |   |
| POAG     | LTBP2  | FCF1  |   |
| POAG     | PMM2   | PMM2  | 1 |
| severity | PMM2   | PMM2  | 1 |
| POAG     | PMM2   | PMM2  | 1 |
| severity | PMM2   | PMM2  | 1 |
| severity | PMM2   | PMM2  |   |
| POAG     | PMM2   | PMM2  | 1 |
| severity | PMM2   | PMM2  | 1 |
| severity | PMM2   | PMM2  |   |
| severity | ZNF469 |       |   |
| severity | GAS7   |       |   |
| severity | GAS7   |       |   |
| severity | GAS7   | GAS7  |   |
| POAG     | GAS7   | GAS7  | 1 |
| severity | GAS7   | GAS7  | 1 |
| POAG     | GAS7   | GAS7  | 1 |
| severity | GAS7   | GAS7  | 1 |
| POAG     | GAS7   | GAS7  |   |

| marker_name    | rsid      | chr | position  |
|----------------|-----------|-----|-----------|
| CHR1:92161907  | 147741973 | 1   | 92161907  |
| CHR1:92187536  | 11466592  | 1   | 92187536  |
| CHR1:92193416  | 11466588  | 1   | 92193416  |
| CHR1:92301182  | 2810903   | 1   | 92301182  |
| CHR1:92301182  | 2810903   | 1   | 92301182  |
| CHR1:165672367 | 4656460   | 1   | 165672367 |
| CHR1:165686873 | 4657471   | 1   | 165686873 |
| CHR1:165687205 | 4656461   | 1   | 165687205 |
| CHR1:165687205 | 4656461   | 1   | 165687205 |
| CHR1:165687665 | 12691499  | 1   | 165687665 |
| CHR1:165687761 | 12691500  | 1   | 165687761 |
| CHR1:165691320 | 6668108   | 1   | 165691320 |
| CHR1:165691768 | 28504591  | 1   | 165691768 |
| CHR1:165691768 | 28504591  | 1   | 165691768 |
| CHR1:165694897 | 7524755   | 1   | 165694897 |
| CHR1:165694897 | 7524755   | 1   | 165694897 |
| CHR1:165695855 | 6660601   | 1   | 165695855 |
| CHR1:165699404 | 367806684 | 1   | 165699404 |
| CHR1:165699406 | 61800426  | 1   | 165699406 |
| CHR1:165699408 | 113635272 | 1   | 165699408 |
| CHR1:165699410 | 71519271  | 1   | 165699410 |
| CHR1:165705788 | 4603103   | 1   | 165705788 |
| CHR1:165705788 | 4603103   | 1   | 165705788 |
| CHR1:165707923 | 6696454   | 1   | 165707923 |
| CHR1:165708633 | 5778472   | 1   | 165708633 |
| CHR1:165708633 | 5778472   | 1   | 165708633 |
| CHR1:165709330 | 7552679   | 1   | 165709330 |
| CHR1:165709330 | 7552679   | 1   | 165709330 |
| CHR1:165709422 | 201160181 | 1   | 165709422 |
| CHR1:165709422 | 201160181 | 1   | 165709422 |
| CHR1:165711089 | 4537525   | 1   | 165711089 |
| CHR1:165711510 | 4269750   | 1   | 165711510 |
| CHR1:165712960 | 4233408   | 1   | 165712960 |
| CHR1:165712960 | 4233408   | 1   | 165712960 |
| CHR1:165713240 | 10800153  | 1   | 165713240 |
| CHR1:165713240 | 10800153  | 1   | 165713240 |
| CHR1:165714416 | 10918274  | 1   | 165714416 |
| CHR1:165714682 | 12133745  | 1   | 165714682 |
| CHR1:165714682 | 12133745  | 1   | 165714682 |
| CHR1:165714742 | 10800154  | 1   | 165714742 |
| CHR1:165718531 | 11409239  | 1   | 165718531 |
| CHR1:165718979 | 7555523   | 1   | 165718979 |
| CHR1:165718979 | 7555523   | 1   | 165718979 |
| CHR1:165719351 | 10529326  | 1   | 165719351 |
| CHR1:165719351 | 10529326  | 1   | 165719351 |
| CHR1:165722646 | 6662839   | 1   | 165722646 |
| CHR1:165723770 | 10800155  | 1   | 165723770 |

|                |           |   |           |
|----------------|-----------|---|-----------|
| CHR1:165731481 | 552130117 | 1 | 165731481 |
| CHR1:165731481 | 552130117 | 1 | 165731481 |
| CHR1:165731482 | 562671281 | 1 | 165731482 |
| CHR1:165731482 | 562671281 | 1 | 165731482 |
| CHR1:165731483 | 531643609 | 1 | 165731483 |
| CHR1:165731483 | 531643609 | 1 | 165731483 |
| CHR1:165731486 | 548466979 | 1 | 165731486 |
| CHR1:165731486 | 548466979 | 1 | 165731486 |
| CHR1:165731487 | 568080919 | 1 | 165731487 |
| CHR1:165731487 | 568080919 | 1 | 165731487 |
| CHR1:165731489 | 549071208 | 1 | 165731489 |
| CHR1:165731489 | 549071208 | 1 | 165731489 |
| CHR1:165732661 | 4657476   | 1 | 165732661 |
| CHR1:165732661 | 4657476   | 1 | 165732661 |
| CHR1:165733100 | 7528177   | 1 | 165733100 |
| CHR1:165733100 | 7528177   | 1 | 165733100 |
| CHR1:165734603 | 6668885   | 1 | 165734603 |
| CHR1:165734603 | 6668885   | 1 | 165734603 |
| CHR1:165736175 | 4657477   | 1 | 165736175 |
| CHR1:165736175 | 4657477   | 1 | 165736175 |
| CHR1:165736880 | 7518099   | 1 | 165736880 |
| CHR1:165736880 | 7518099   | 1 | 165736880 |
| CHR1:165738311 | 2251768   | 1 | 165738311 |
| CHR1:165738311 | 2251768   | 1 | 165738311 |
| CHR1:165739598 | 2814471   | 1 | 165739598 |
| CHR1:165739598 | 2814471   | 1 | 165739598 |
| CHR1:171507100 | 71637418  | 1 | 171507100 |
| CHR1:171508359 | 12145085  | 1 | 171508359 |
| CHR1:171512303 | 111832311 | 1 | 171512303 |
| CHR1:171551159 |           | 1 | 171551159 |
| CHR1:171553778 | 235495    | 1 | 171553778 |
| CHR1:171563406 | 235911    | 1 | 171563406 |
| CHR1:171573374 | 235892    | 1 | 171573374 |
| CHR1:171578114 | 235899    | 1 | 171578114 |
| CHR1:171578532 | 235900    | 1 | 171578532 |
| CHR1:171579628 | 183533    | 1 | 171579628 |
| CHR1:171579689 | 190198    | 1 | 171579689 |
| CHR1:171579865 | 235901    | 1 | 171579865 |
| CHR1:171580024 | 235902    | 1 | 171580024 |
| CHR1:171580343 | 235903    | 1 | 171580343 |
| CHR2:38241617  | 192750982 | 2 | 38241617  |
| CHR2:38351642  | 2432663   | 2 | 38351642  |
| CHR2:38353722  | 2432660   | 2 | 38353722  |
| CHR2:38356852  | 232624    | 2 | 38356852  |
| CHR2:38361113  | 232614    | 2 | 38361113  |
| CHR2:38373412  | 232609    | 2 | 38373412  |
| CHR3:171937605 | 6779857   | 3 | 171937605 |
| CHR3:171939269 | 9855667   | 3 | 171939269 |



|                |           |   |           |
|----------------|-----------|---|-----------|
| CHR3:171941100 | 73880127  | 3 | 171941100 |
| CHR3:172008345 | 73031394  | 3 | 172008345 |
| CHR3:172008879 | 114637713 | 3 | 172008879 |
| CHR3:172012092 | 113632840 | 3 | 172012092 |
| CHR3:172013377 | 73031398  | 3 | 172013377 |
| CHR3:172014308 | 115991475 | 3 | 172014308 |
| CHR3:172014578 | 73031399  | 3 | 172014578 |
| CHR3:172015559 | 58471577  | 3 | 172015559 |
| CHR3:172016499 |           | 3 | 172016499 |
| CHR3:172017937 | 78859439  | 3 | 172017937 |
| CHR3:172020726 |           | 3 | 172020726 |
| CHR3:172020726 |           | 3 | 172020726 |
| CHR3:172030347 | 147497110 | 3 | 172030347 |
| CHR3:172033011 | 111698934 | 3 | 172033011 |
| CHR3:172033011 | 111698934 | 3 | 172033011 |
| CHR3:172036000 | 9837350   | 3 | 172036000 |
| CHR3:172036002 |           | 3 | 172036002 |
| CHR3:172036008 | 9819859   | 3 | 172036008 |
| CHR3:172037685 | 56825723  | 3 | 172037685 |
| CHR3:172037685 | 56825723  | 3 | 172037685 |
| CHR3:172041372 | 112977826 | 3 | 172041372 |
| CHR3:172041372 | 112977826 | 3 | 172041372 |
| CHR3:172042640 | 9832833   | 3 | 172042640 |
| CHR3:172043042 | 9837505   | 3 | 172043042 |
| CHR3:172043042 | 9837505   | 3 | 172043042 |
| CHR3:172043329 | 73035118  | 3 | 172043329 |
| CHR3:172043329 | 73035118  | 3 | 172043329 |
| CHR3:172115902 | 12897     | 3 | 172115902 |
| CHR3:172115902 | 12897     | 3 | 172115902 |
| CHR3:172162657 | 543920867 | 3 | 172162657 |
| CHR4:7678735   | 13110238  | 4 | 7678735   |
| CHR4:7815188   | 28719944  | 4 | 7815188   |
| CHR4:7821682   | 4689873   | 4 | 7821682   |
| CHR4:7832325   | 71647634  | 4 | 7832325   |
| CHR4:7835861   | 28685653  | 4 | 7835861   |
| CHR4:7835861   | 28685653  | 4 | 7835861   |
| CHR4:7836666   | 4328916   | 4 | 7836666   |
| CHR4:7836666   | 4328916   | 4 | 7836666   |
| CHR4:7842550   | 78258460  | 4 | 7842550   |
| CHR4:7853160   | 4619890   | 4 | 7853160   |
| CHR4:7853160   | 4619890   | 4 | 7853160   |
| CHR4:7904111   | 1320074   | 4 | 7904111   |
| CHR4:7904111   | 1320074   | 4 | 7904111   |
| CHR4:7924690   | 11732100  | 4 | 7924690   |
| CHR4:7924690   | 11732100  | 4 | 7924690   |
| CHR4:7928845   | 11733297  | 4 | 7928845   |
| CHR4:111462759 | 146940532 | 4 | 111462759 |
| CHR4:111474827 | 79389692  | 4 | 111474827 |

|                |           |   |           |
|----------------|-----------|---|-----------|
| CHR4:111531104 | 149007774 | 4 | 111531104 |
| CHR4:111559261 | 145638916 | 4 | 111559261 |
| CHR6:1548369   | 2745572   | 6 | 1548369   |
| CHR6:1548369   | 2745572   | 6 | 1548369   |
| CHR6:1573354   | 138300070 | 6 | 1573354   |
| CHR6:1607603   | 2235718   | 6 | 1607603   |
| CHR6:1607603   | 2235718   | 6 | 1607603   |
| CHR6:1922907   | 11969985  | 6 | 1922907   |
| CHR6:1922907   | 11969985  | 6 | 1922907   |
| CHR6:1949101   | 2761233   | 6 | 1949101   |
| CHR6:1949101   | 2761233   | 6 | 1949101   |
| CHR6:2248675   | 13217030  | 6 | 2248675   |
| CHR6:2248675   | 13217030  | 6 | 2248675   |
| CHR6:2316733   | 139535727 | 6 | 2316733   |
| CHR7:116111888 | 75347112  | 7 | 116111888 |
| CHR7:116111888 | 75347112  | 7 | 116111888 |
| CHR7:116150095 | 10258482  | 7 | 116150095 |
| CHR7:116150095 | 10258482  | 7 | 116150095 |
| CHR7:116150952 | 10262524  | 7 | 116150952 |
| CHR7:116150952 | 10262524  | 7 | 116150952 |
| CHR7:116156961 | 7795510   | 7 | 116156961 |
| CHR7:116156961 | 7795510   | 7 | 116156961 |
| CHR7:116190469 | 3801994   | 7 | 116190469 |
| CHR7:116190469 | 3801994   | 7 | 116190469 |
| CHR7:129410227 | 76481776  | 7 | 129410227 |
| CHR7:129410227 | 76481776  | 7 | 129410227 |
| CHR7:129429950 | 76925741  | 7 | 129429950 |
| CHR7:129430361 | 55817702  | 7 | 129430361 |
| CHR7:129430373 | 55951852  | 7 | 129430373 |
| CHR7:129430556 | 56368013  | 7 | 129430556 |
| CHR7:129430661 | 111750438 | 7 | 129430661 |
| CHR7:129478199 | 78939185  | 7 | 129478199 |
| CHR7:129505141 | 3807120   | 7 | 129505141 |
| CHR8:105809466 | 113133592 | 8 | 105809466 |
| CHR8:105965578 | 284495    | 8 | 105965578 |
| CHR8:105965578 | 284495    | 8 | 105965578 |
| CHR8:105978990 | 1521774   | 8 | 105978990 |
| CHR8:105978990 | 1521774   | 8 | 105978990 |
| CHR9:21987353  | 3731207   | 9 | 21987353  |
| CHR9:21987585  | 3731203   | 9 | 21987585  |
| CHR9:22003367  | 1063192   | 9 | 22003367  |
| CHR9:22003367  | 1063192   | 9 | 22003367  |
| CHR9:22005330  | 3217986   | 9 | 22005330  |
| CHR9:22007357  |           | 9 | 22007357  |
| CHR9:22017836  | 643319    | 9 | 22017836  |
| CHR9:22019673  | 518394    | 9 | 22019673  |
| CHR9:22019673  | 518394    | 9 | 22019673  |
| CHR9:22019732  | 10757264  | 9 | 22019732  |

|                |           |    |           |
|----------------|-----------|----|-----------|
| CHR9:22020493  | 490005    | 9  | 22020493  |
| CHR9:22025067  | 10811644  | 9  | 22025067  |
| CHR9:22025240  | 7035484   | 9  | 22025240  |
| CHR9:22055048  | 2383204   | 9  | 22055048  |
| CHR9:22055048  | 2383204   | 9  | 22055048  |
| CHR9:22068652  | 4977756   | 9  | 22068652  |
| CHR9:22068652  | 4977756   | 9  | 22068652  |
| CHR9:22072719  | 10757270  | 9  | 22072719  |
| CHR9:22072719  | 10757270  | 9  | 22072719  |
| CHR9:22142466  | 145824083 | 9  | 22142466  |
| CHR9:22151067  | 149690079 | 9  | 22151067  |
| CHR9:22152358  | 149594582 | 9  | 22152358  |
| CHR9:22152497  | 72656752  | 9  | 22152497  |
| CHR9:22168937  | 146624304 | 9  | 22168937  |
| CHR9:22174808  | 144170300 | 9  | 22174808  |
| CHR9:22174808  | 144170300 | 9  | 22174808  |
| CHR9:22180026  | 145563016 | 9  | 22180026  |
| CHR9:22180026  | 145563016 | 9  | 22180026  |
| CHR9:22189428  | 137879199 | 9  | 22189428  |
| CHR9:22189428  | 137879199 | 9  | 22189428  |
| CHR9:22198158  | 150350996 | 9  | 22198158  |
| CHR9:22198158  | 150350996 | 9  | 22198158  |
| CHR9:22199481  | 141929766 | 9  | 22199481  |
| CHR9:22199481  | 141929766 | 9  | 22199481  |
| CHR9:22200273  | 150993044 | 9  | 22200273  |
| CHR9:22200273  | 150993044 | 9  | 22200273  |
| CHR9:22200956  | 79721419  | 9  | 22200956  |
| CHR9:22200956  | 79721419  | 9  | 22200956  |
| CHR9:107695848 | 2472493   | 9  | 107695848 |
| CHR9:107695848 | 2472493   | 9  | 107695848 |
| CHR9:107703934 | 2487032   | 9  | 107703934 |
| CHR9:107703934 | 2487032   | 9  | 107703934 |
| CHR9:136128654 | 190394322 | 9  | 136128654 |
| CHR9:136132699 | 556271118 | 9  | 136132699 |
| CHR9:136133075 | 566680282 | 9  | 136133075 |
| CHR9:136138316 | 587772957 | 9  | 136138316 |
| CHR9:136146250 | 184029852 | 9  | 136146250 |
| CHR9:136153058 | 587594880 | 9  | 136153058 |
| CHR9:136193037 | 76416297  | 9  | 136193037 |
| CHR9:136193037 | 76416297  | 9  | 136193037 |
| CHR9:136193781 | 201438659 | 9  | 136193781 |
| CHR9:136195865 | 58252853  | 9  | 136195865 |
| CHR9:136197286 | 551169    | 9  | 136197286 |
| CHR9:136197286 | 551169    | 9  | 136197286 |
| CHR9:137504061 |           | 9  | 137504061 |
| CHR9:137513490 | 78709263  | 9  | 137513490 |
| CHR9:137513490 | 78709263  | 9  | 137513490 |
| CHR10:13178766 | 75654767  | 10 | 13178766  |

|                |           |    |          |
|----------------|-----------|----|----------|
| CHR10:13178766 | 75654767  | 10 | 13178766 |
| CHR10:70000881 | 1900004   | 10 | 70000881 |
| CHR10:70000881 | 1900004   | 10 | 70000881 |
| CHR14:60971137 | 1018533   | 14 | 60971137 |
| CHR14:60971137 | 1018533   | 14 | 60971137 |
| CHR14:61072875 | 10483727  | 14 | 61072875 |
| CHR14:61072875 | 10483727  | 14 | 61072875 |
| CHR14:75139392 | 143377610 | 14 | 75139392 |
| CHR14:75142142 | 149459971 | 14 | 75142142 |
| CHR14:75158377 | 142462448 | 14 | 75158377 |
| CHR14:75172187 |           | 14 | 75172187 |
| CHR14:75185301 | 368184334 | 14 | 75185301 |
| CHR14:75188877 | 376719842 | 14 | 75188877 |
| CHR16:8896931  | 3785176   | 16 | 8896931  |
| CHR16:8896931  | 3785176   | 16 | 8896931  |
| CHR16:8908811  | 8057024   | 16 | 8908811  |
| CHR16:8908811  | 8057024   | 16 | 8908811  |
| CHR16:8908857  | 13332985  | 16 | 8908857  |
| CHR16:8912742  | 67792030  | 16 | 8912742  |
| CHR16:8912742  | 67792030  | 16 | 8912742  |
| CHR16:8941234  | 540303696 | 16 | 8941234  |
| CHR16:88480228 | 377561280 | 16 | 88480228 |
| CHR17:9968071  |           | 17 | 9968071  |
| CHR17:9968075  |           | 17 | 9968075  |
| CHR17:9968078  | 200525278 | 17 | 9968078  |
| CHR17:9968097  | 8080535   | 17 | 9968097  |
| CHR17:9968168  | 8080112   | 17 | 9968168  |
| CHR17:9968419  | 12603210  | 17 | 9968419  |
| CHR17:9970463  | 56979842  | 17 | 9970463  |
| CHR17:9970474  | 8072698   | 17 | 9970474  |
| CHR17:9970563  | 8077367   | 17 | 9970563  |
| CHR17:9970600  | 8077380   | 17 | 9970600  |
| CHR17:9971058  | 8072479   | 17 | 9971058  |
| CHR17:9971121  | 9913492   | 17 | 9971121  |
| CHR17:9972709  | 12601125  | 17 | 9972709  |
| CHR17:10020501 | 9897123   | 17 | 10020501 |
| CHR17:10020501 | 9897123   | 17 | 10020501 |
| CHR17:10031183 | 9913911   | 17 | 10031183 |
| CHR17:10031183 | 9913911   | 17 | 10031183 |
| CHR17:10086690 | 72810945  | 17 | 10086690 |
| CHR17:10091568 | 72810953  | 17 | 10091568 |
| CHR17:10094128 | 72810958  | 17 | 10094128 |
| CHR17:10094437 | 141427698 | 17 | 10094437 |

| rsquare | other_allele | effect_allele | beta     |
|---------|--------------|---------------|----------|
| 0.92286 | T            | G             | 0.1706   |
| 0.92237 | T            | A             | 0.2328   |
| 0.93337 | C            | A             | 0.19     |
| 0.97689 | A            | G             | 0.008836 |
| 0.97689 | A            | G             | 0.009441 |
| 0.80764 | C            | A             | -0.09135 |
| 0.83914 | C            | T             | -0.08366 |
| 0.87151 | A            | G             | -0.04271 |
| 0.87151 | A            | G             | -0.02869 |
| 0.87622 | C            | A             | -0.04581 |
| 0.87668 | G            | A             | -0.04491 |
| 0.8432  | G            | A             | -0.08442 |
| 0.84831 | G            | A             | -0.08659 |
| 0.84831 | G            | A             | -0.07938 |
| 0.88164 | C            | T             | -0.04218 |
| 0.88164 | C            | T             | -0.02855 |
| 0.84277 | T            | C             | -0.08244 |
| 0.84595 | A            | C             | -0.075   |
| 0.84599 | A            | C             | -0.07498 |
| 0.84604 | A            | C             | -0.07499 |
| 0.84608 | A            | C             | -0.07498 |
| 0.85246 | G            | C             | -0.08545 |
| 0.85246 | G            | C             | -0.07796 |
| 0.84202 | C            | T             | -0.08278 |
| 0.81552 | AT           | A             | -0.08095 |
| 0.81552 | AT           | A             | -0.07606 |
| 0.85006 | C            | T             | -0.08579 |
| 0.85006 | C            | T             | -0.07829 |
| 0.8677  | G            | GT            | -0.07624 |
| 0.8677  | G            | GT            | -0.06622 |
| 0.84218 | G            | T             | -0.08453 |
| 0.84044 | T            | C             | -0.08338 |
| 0.93956 | A            | G             | -0.03299 |
| 0.93956 | A            | G             | -0.0178  |
| 0.84755 | G            | A             | -0.08629 |
| 0.84755 | G            | A             | -0.07867 |
| 0.83999 | C            | T             | -0.08499 |
| 0.83812 | T            | C             | -0.08407 |
| 0.83812 | T            | C             | -0.0755  |
| 0.83841 | G            | C             | -0.08393 |
| 0.83861 | AT           | A             | -0.08403 |
| 0.86231 | A            | C             | -0.07462 |
| 0.86231 | A            | C             | -0.06412 |
| 0.86686 | ATCTT        | A             | -0.0766  |
| 0.86686 | ATCTT        | A             | -0.0662  |
| 0.83628 | G            | T             | -0.0836  |
| 0.89838 | G            | A             | -0.0505  |

|            |       |          |
|------------|-------|----------|
| 0.82126 A  | T     | -0.0873  |
| 0.82126 A  | T     | -0.07675 |
| 0.82109 T  | A     | -0.08732 |
| 0.82109 T  | A     | -0.07679 |
| 0.82093 A  | T     | -0.08733 |
| 0.82093 A  | T     | -0.0768  |
| 0.82076 T  | G     | -0.08733 |
| 0.82076 T  | G     | -0.07681 |
| 0.8206 A   | G     | -0.08736 |
| 0.8206 A   | G     | -0.07683 |
| 0.82044 TA | T     | -0.08736 |
| 0.82044 TA | T     | -0.07685 |
| 0.81058 T  | C     | -0.08705 |
| 0.81058 T  | C     | -0.07898 |
| 0.81917 G  | A     | -0.0878  |
| 0.81917 G  | A     | -0.08104 |
| 0.85157 C  | T     | -0.07633 |
| 0.85157 C  | T     | -0.06646 |
| 0.80519 T  | C     | -0.08719 |
| 0.80519 T  | C     | -0.07753 |
| 0.80912 T  | C     | -0.0866  |
| 0.80912 T  | C     | -0.0799  |
| 0.83607 T  | A     | -0.07689 |
| 0.83607 T  | A     | -0.06711 |
| 0.83015 T  | C     | -0.07707 |
| 0.83015 T  | C     | -0.06735 |
| 0.97743 T  | C     | 0.04974  |
| 0.97776 T  | C     | 0.04968  |
| 0.97173 G  | T     | 0.0496   |
| 0.98098 C  | CTTGT | 0.04968  |
| 0.97883 G  | A     | 0.04985  |
| 0.97092 A  | G     | 0.05071  |
| 0.96726 A  | G     | 0.05058  |
| 0.96309 C  | T     | 0.05081  |
| 0.96178 T  | C     | 0.05097  |
| 0.95945 T  | G     | 0.05126  |
| 0.95904 G  | A     | 0.0518   |
| 0.95834 G  | A     | 0.05189  |
| 0.95673 A  | G     | 0.05213  |
| 0.95656 T  | G     | 0.05211  |
| 0.86692 C  | T     | 0.5103   |
| 0.92573 T  | C     | 0.09611  |
| 0.91841 A  | G     | 0.09426  |
| 0.90854 T  | C     | 0.09394  |
| 0.89535 A  | G     | 0.09584  |
| 0.87401 T  | G     | 0.09401  |
| 0.90372 A  | G     | -0.04358 |
| 0.90372 G  | A     | -0.04223 |

|               |       |          |
|---------------|-------|----------|
| 0.90085 G     | T     | -0.04232 |
| 0.88949 G     | A     | 0.1195   |
| 0.86384 T     | A     | -0.12    |
| 0.88739 C     | T     | 0.1248   |
| 0.88934 T     | A     | 0.125    |
| 0.83207 T     | C     | -0.1275  |
| 0.89172 T     | G     | 0.1261   |
| 0.82117 T     | C     | -0.1299  |
| 0.82037 G     | GA    | -0.1314  |
| 0.81983 T     | A     | -0.133   |
| 0.92477 G     | GAGAC | 0.1595   |
| 0.92477 G     | GAGAC | 0.1444   |
| 0.87742 GT    | G     | -0.1316  |
| 0.88298 G     | C     | 0.1644   |
| 0.88298 G     | C     | 0.1571   |
| 0.84395 C     | A     | -0.1333  |
| 0.84369 T     | TA    | -0.1333  |
| 0.84342 G     | T     | -0.1333  |
| 0.87502 A     | G     | 0.1646   |
| 0.87502 A     | G     | 0.1583   |
| 0.87368 T     | G     | 0.1612   |
| 0.87368 T     | G     | 0.1576   |
| 0.82223 A     | C     | -0.1342  |
| 0.8179 A      | G     | -0.1124  |
| 0.8179 A      | G     | -0.1357  |
| 0.87372 T     | A     | 0.1607   |
| 0.87372 T     | A     | 0.1575   |
| 0.84519 A     | G     | -0.02098 |
| 0.84519 A     | G     | -0.0116  |
| 0.86574 T     | G     | -0.3082  |
| 0.80731 C     | G     | -0.05467 |
| 0.96525 C     | T     | 0.03726  |
| 0.97431 C     | G     | 0.03994  |
| 0.97463 TTTA  | T     | 0.03686  |
| 0.97019 TATAC | T     | 0.04482  |
| 0.97019 TATAC | T     | 0.04325  |
| 0.96839 C     | T     | 0.04269  |
| 0.96839 C     | T     | 0.04136  |
| 0.96614 A     | G     | 0.07508  |
| 0.96383 A     | G     | -0.03435 |
| 0.96383 A     | G     | -0.03551 |
| 0.99185 G     | T     | -0.03212 |
| 0.99185 G     | T     | -0.03693 |
| 0.95981 T     | C     | -0.03317 |
| 0.95981 T     | C     | -0.03159 |
| 0.95943 C     | T     | -0.05123 |
| 0.82196 A     | T     | 0.255    |
| 0.82185 G     | T     | 0.2716   |

|            |    |           |
|------------|----|-----------|
| 0.86084 C  | T  | 0.2521    |
| 0.895 T    | G  | 0.2256    |
| 0.9049 G   | A  | -0.00647  |
| 0.9049 G   | A  | -0.009501 |
| 0.82041 T  | G  | 0.2263    |
| 0.53235 T  | C  | -0.01738  |
| 0.53235 T  | C  | -0.01402  |
| 0.98683 A  | G  | -0.01118  |
| 0.98683 A  | G  | -0.003866 |
| 0.93268 C  | T  | 0.01078   |
| 0.93268 C  | T  | 0.005432  |
| 0.935 T    | C  | -0.01048  |
| 0.935 T    | C  | -0.002724 |
| 0.88692 T  | C  | 0.213     |
| 0.83769 A  | T  | 0.02829   |
| 0.83769 A  | T  | 0.0431    |
| 0.99792 A  | C  | 0.01292   |
| 0.99792 A  | C  | 0.011     |
| 0.99743 A  | C  | 0.0128    |
| 0.99743 A  | C  | 0.01085   |
| 0.95976 C  | T  | -0.006621 |
| 0.95976 C  | T  | -0.009503 |
| 0.9528 A   | G  | -0.02126  |
| 0.9528 A   | G  | -0.04137  |
| 0.98894 T  | C  | -0.07791  |
| 0.98894 T  | C  | -0.01795  |
| 0.99338 G  | C  | -0.1166   |
| 0.99546 G  | A  | -0.1166   |
| 0.99582 T  | G  | -0.1166   |
| 0.99725 C  | T  | -0.1166   |
| 0.99834 C  | T  | -0.1166   |
| 0.90293 C  | G  | -0.3327   |
| 0.83623 T  | C  | -0.06249  |
| 0.89673 T  | C  | 0.2496    |
| 0.9988 C   | T  | -0.02059  |
| 0.9988 C   | T  | -0.01507  |
| 0.93535 A  | G  | 0.02056   |
| 0.93535 A  | G  | 0.01356   |
| 0.95748 A  | G  | -0.1044   |
| 0.95619 AT | A  | -0.1048   |
| 0.98499 A  | G  | 0.05457   |
| 0.98499 A  | G  | 0.06635   |
| 0.84732 G  | T  | 0.133     |
| 0.99536 C  | CA | 0.07416   |
| 0.99922 A  | C  | -0.03827  |
| 0.99906 C  | G  | -0.05999  |
| 0.99906 C  | G  | -0.06952  |
| 0.99705 G  | A  | 0.04213   |



|            |    |           |
|------------|----|-----------|
| 0.99566 A  | G  | -0.04077  |
| 0.99994 T  | A  | 0.04393   |
| 0.99986 G  | C  | 0.04395   |
| 0.99822 G  | A  | 0.04812   |
| 0.99822 G  | A  | 0.04142   |
| 0.9929 A   | G  | -0.005616 |
| 0.9929 A   | G  | -0.002885 |
| 0.97496 G  | A  | -0.002961 |
| 0.97496 G  | A  | -0.005873 |
| 0.87161 C  | A  | 0.1175    |
| 0.89022 A  | G  | 0.1155    |
| 0.8802 T   | C  | 0.1236    |
| 0.867 T    | C  | 0.1214    |
| 0.91854 G  | A  | 0.1208    |
| 0.89435 T  | C  | 0.1248    |
| 0.89435 T  | C  | 0.1281    |
| 0.87713 C  | G  | 0.1321    |
| 0.87713 C  | G  | 0.1356    |
| 0.88273 T  | A  | 0.1366    |
| 0.88273 T  | A  | 0.1393    |
| 0.86996 T  | C  | 0.1397    |
| 0.86996 T  | C  | 0.1412    |
| 0.86073 G  | A  | 0.1396    |
| 0.86073 G  | A  | 0.141     |
| 0.86019 T  | G  | 0.1409    |
| 0.86019 T  | G  | 0.1418    |
| 0.85877 A  | G  | 0.141     |
| 0.85877 A  | G  | 0.1416    |
| 0.91614 A  | G  | -0.02631  |
| 0.91614 A  | G  | -0.02716  |
| 0.97592 A  | G  | -0.008292 |
| 0.97592 A  | G  | -0.002277 |
| 0.8284 T   | C  | -0.338    |
| 0.83262 A  | G  | -0.3386   |
| 0.83281 A  | G  | -0.3387   |
| 0.94183 T  | C  | -0.3554   |
| 0.91307 C  | T  | -0.3596   |
| 0.91599 T  | C  | -0.3613   |
| 0.89518 A  | G  | 0.08509   |
| 0.89518 A  | G  | 0.07881   |
| 0.86017 GA | G  | 0.05996   |
| 0.90895 T  | C  | 0.06396   |
| 0.9001 A   | G  | 0.04741   |
| 0.9001 A   | G  | 0.04265   |
| 0.96409 G  | GA | -0.08187  |
| 0.83164 T  | C  | -0.08744  |
| 0.83164 T  | C  | -0.08146  |
| 0.19787 A  | G  | 0.3234    |

|             |      |           |
|-------------|------|-----------|
| 0.19787 A   | G    | 0.2701    |
| 0.92411 T   | C    | -0.008412 |
| 0.92411 T   | C    | 0.002139  |
| 0.97537 C   | T    | -0.009241 |
| 0.97537 C   | T    | -0.02627  |
| 0.83384 C   | T    | -0.02893  |
| 0.83384 C   | T    | -0.06457  |
| 0.80987 T   | C    | 0.5246    |
| 0.81621 A   | G    | 0.5227    |
| 0.80397 A   | G    | 0.4722    |
| 0.86787 C   | CCT  | 0.5039    |
| 0.87894 T   | C    | 0.5014    |
| 0.88177 G   | A    | 0.5006    |
| 0.83609 C   | A    | -0.03766  |
| 0.83609 C   | A    | -0.03748  |
| 0.84425 A   | G    | 0.008799  |
| 0.84425 A   | G    | 0.01593   |
| 0.86015 A   | G    | -0.04884  |
| 0.84433 T   | G    | -0.03069  |
| 0.84433 T   | G    | -0.03662  |
| 0.81685 TAA | T    | -0.04913  |
| 0.81135 T   | C    | 0.1823    |
| 0.9717 G    | GT   | -0.04408  |
| 0.97122 G   | GTTT | -0.04409  |
| 0.95737 G   | T    | -0.04329  |
| 0.97455 G   | A    | -0.04385  |
| 0.97391 T   | C    | -0.04384  |
| 0.98273 T   | C    | -0.03801  |
| 0.89541 T   | G    | -0.04798  |
| 0.94172 G   | C    | -0.03877  |
| 0.94201 C   | T    | -0.04067  |
| 0.94142 C   | T    | -0.04121  |
| 0.94002 G   | T    | -0.0408   |
| 0.93085 T   | C    | -0.03981  |
| 0.94708 C   | T    | -0.03928  |
| 0.89186 T   | C    | -0.0192   |
| 0.89186 T   | C    | -0.01073  |
| 0.97456 G   | A    | -0.03585  |
| 0.97456 G   | A    | -0.03195  |
| 0.90698 T   | C    | -0.3445   |
| 0.91295 C   | A    | -0.213    |
| 0.88523 T   | C    | -0.2056   |
| 0.89265 T   | A    | -0.2234   |

| se      | pvalue     | NS_CASE | NS_CTRL |
|---------|------------|---------|---------|
| 0.05118 | 0.0008652  | 1890    | 2205    |
| 0.06859 | 0.000695   | 1890    | 2205    |
| 0.0557  | 0.0006529  | 1890    | 2205    |
| 0.01589 | 0.5783     | 1890    | 2205    |
| 0.01709 | 0.5807     | 946     | 2167    |
| 0.02616 | 0.0004846  | 1890    | 2205    |
| 0.02086 | 0.0000618  | 1890    | 2205    |
| 0.01357 | 0.001654   | 1890    | 2205    |
| 0.01459 | 0.04934    | 946     | 2167    |
| 0.01333 | 0.0005963  | 1890    | 2205    |
| 0.01331 | 0.0007489  | 1890    | 2205    |
| 0.02079 | 0.00004979 | 1890    | 2205    |
| 0.02041 | 0.00002266 | 1890    | 2205    |
| 0.0224  | 0.0003992  | 946     | 2167    |
| 0.01634 | 0.009871   | 1890    | 2205    |
| 0.01774 | 0.1076     | 946     | 2167    |
| 0.02087 | 0.00007952 | 1890    | 2205    |
| 0.01944 | 0.0001163  | 1890    | 2205    |
| 0.01944 | 0.0001167  | 1890    | 2205    |
| 0.01944 | 0.0001164  | 1890    | 2205    |
| 0.01944 | 0.0001165  | 1890    | 2205    |
| 0.02027 | 0.00002541 | 1890    | 2205    |
| 0.02223 | 0.0004607  | 946     | 2167    |
| 0.0208  | 0.00007008 | 1890    | 2205    |
| 0.01986 | 0.00004652 | 1890    | 2205    |
| 0.02172 | 0.000468   | 946     | 2167    |
| 0.02027 | 0.00002373 | 1890    | 2205    |
| 0.02224 | 0.0004368  | 946     | 2167    |
| 0.01756 | 0.00001445 | 1890    | 2205    |
| 0.01922 | 0.0005781  | 946     | 2167    |
| 0.02065 | 0.00004346 | 1890    | 2205    |
| 0.02078 | 0.00006105 | 1890    | 2205    |
| 0.01207 | 0.006301   | 1890    | 2205    |
| 0.01295 | 0.1693     | 946     | 2167    |
| 0.02027 | 0.00002127 | 1890    | 2205    |
| 0.02224 | 0.0004098  | 946     | 2167    |
| 0.02065 | 0.00003944 | 1890    | 2205    |
| 0.02078 | 0.00005311 | 1890    | 2205    |
| 0.02285 | 0.0009634  | 946     | 2167    |
| 0.02078 | 0.00005458 | 1890    | 2205    |
| 0.02062 | 0.0000468  | 1890    | 2205    |
| 0.01728 | 0.00001608 | 1890    | 2205    |
| 0.01888 | 0.000693   | 946     | 2167    |
| 0.01748 | 0.00001202 | 1890    | 2205    |
| 0.01913 | 0.0005482  | 946     | 2167    |
| 0.02071 | 0.00005527 | 1890    | 2205    |
| 0.0151  | 0.0008342  | 1890    | 2205    |

|         |            |      |      |
|---------|------------|------|------|
| 0.02074 | 0.00002625 | 1890 | 2205 |
| 0.02282 | 0.0007781  | 946  | 2167 |
| 0.02075 | 0.00002615 | 1890 | 2205 |
| 0.02282 | 0.0007739  | 946  | 2167 |
| 0.02075 | 0.00002613 | 1890 | 2205 |
| 0.02282 | 0.0007734  | 946  | 2167 |
| 0.02075 | 0.00002618 | 1890 | 2205 |
| 0.02282 | 0.0007723  | 946  | 2167 |
| 0.02075 | 0.00002608 | 1890 | 2205 |
| 0.02282 | 0.0007703  | 946  | 2167 |
| 0.02075 | 0.00002611 | 1890 | 2205 |
| 0.02282 | 0.000769   | 946  | 2167 |
| 0.02097 | 0.00003375 | 1890 | 2205 |
| 0.02306 | 0.0006247  | 946  | 2167 |
| 0.02043 | 0.00001765 | 1890 | 2205 |
| 0.0224  | 0.0003008  | 946  | 2167 |
| 0.01747 | 0.00001277 | 1890 | 2205 |
| 0.01911 | 0.0005113  | 946  | 2167 |
| 0.02111 | 0.00003682 | 1890 | 2205 |
| 0.02321 | 0.0008471  | 946  | 2167 |
| 0.02054 | 0.00002546 | 1890 | 2205 |
| 0.0225  | 0.0003898  | 946  | 2167 |
| 0.01765 | 0.00001348 | 1890 | 2205 |
| 0.01929 | 0.0005117  | 946  | 2167 |
| 0.01771 | 0.00001387 | 1890 | 2205 |
| 0.01936 | 0.000512   | 946  | 2167 |
| 0.01498 | 0.0009065  | 1890 | 2205 |
| 0.01498 | 0.0009189  | 1890 | 2205 |
| 0.01498 | 0.0009369  | 1890 | 2205 |
| 0.015   | 0.0009344  | 1890 | 2205 |
| 0.01502 | 0.0009147  | 1890 | 2205 |
| 0.01513 | 0.0008097  | 1890 | 2205 |
| 0.01534 | 0.0009871  | 1890 | 2205 |
| 0.01539 | 0.0009719  | 1890 | 2205 |
| 0.0154  | 0.0009443  | 1890 | 2205 |
| 0.01543 | 0.0008984  | 1890 | 2205 |
| 0.01542 | 0.0007906  | 1890 | 2205 |
| 0.01543 | 0.0007781  | 1890 | 2205 |
| 0.01544 | 0.0007429  | 1890 | 2205 |
| 0.01545 | 0.0007487  | 1890 | 2205 |
| 0.1528  | 0.0008496  | 1890 | 2205 |
| 0.02741 | 0.0004588  | 1890 | 2205 |
| 0.02753 | 0.0006241  | 1890 | 2205 |
| 0.02764 | 0.0006852  | 1890 | 2205 |
| 0.02798 | 0.0006201  | 1890 | 2205 |
| 0.02846 | 0.0009639  | 1890 | 2205 |
| 0.0129  | 0.0007336  | 1890 | 2205 |
| 0.01276 | 0.0009469  | 1890 | 2205 |

|         |             |      |      |
|---------|-------------|------|------|
| 0.01279 | 0.0009476   | 1890 | 2205 |
| 0.03285 | 0.0002777   | 1890 | 2205 |
| 0.03454 | 0.000518    | 946  | 2167 |
| 0.03301 | 0.000159    | 1890 | 2205 |
| 0.03302 | 0.0001549   | 1890 | 2205 |
| 0.03569 | 0.0003609   | 946  | 2167 |
| 0.03301 | 0.000136    | 1890 | 2205 |
| 0.03632 | 0.0003532   | 946  | 2167 |
| 0.03656 | 0.0003298   | 946  | 2167 |
| 0.03678 | 0.0003046   | 946  | 2167 |
| 0.03516 | 0.000005839 | 1890 | 2205 |
| 0.03981 | 0.0002907   | 946  | 2167 |
| 0.03601 | 0.0002624   | 946  | 2167 |
| 0.03995 | 0.00003933  | 1890 | 2205 |
| 0.04553 | 0.000565    | 946  | 2167 |
| 0.03645 | 0.0002595   | 946  | 2167 |
| 0.03646 | 0.0002599   | 946  | 2167 |
| 0.03646 | 0.0002603   | 946  | 2167 |
| 0.0401  | 0.00004122  | 1890 | 2205 |
| 0.04575 | 0.0005452   | 946  | 2167 |
| 0.03978 | 0.00005166  | 1890 | 2205 |
| 0.04521 | 0.0004985   | 946  | 2167 |
| 0.03672 | 0.0002619   | 946  | 2167 |
| 0.03388 | 0.000915    | 1890 | 2205 |
| 0.03612 | 0.000174    | 946  | 2167 |
| 0.03976 | 0.00005391  | 1890 | 2205 |
| 0.04521 | 0.0005019   | 946  | 2167 |
| 0.01524 | 0.1687      | 1890 | 2205 |
| 0.01638 | 0.4787      | 946  | 2167 |
| 0.08912 | 0.00055     | 1890 | 2205 |
| 0.0154  | 0.0003901   | 946  | 2167 |
| 0.01126 | 0.0009406   | 1890 | 2205 |
| 0.0111  | 0.000322    | 1890 | 2205 |
| 0.01103 | 0.0008372   | 1890 | 2205 |
| 0.01115 | 0.00005938  | 1890 | 2205 |
| 0.01206 | 0.0003426   | 946  | 2167 |
| 0.01096 | 0.0001004   | 1890 | 2205 |
| 0.01187 | 0.0004979   | 946  | 2167 |
| 0.0228  | 0.0009999   | 1890 | 2205 |
| 0.01376 | 0.0126      | 1890 | 2205 |
| 0.01476 | 0.01618     | 946  | 2167 |
| 0.0131  | 0.0143      | 1890 | 2205 |
| 0.014   | 0.008361    | 946  | 2167 |
| 0.01549 | 0.0323      | 1890 | 2205 |
| 0.01633 | 0.0531      | 946  | 2167 |
| 0.01547 | 0.0009379   | 1890 | 2205 |
| 0.07581 | 0.0007751   | 1890 | 2205 |
| 0.07269 | 0.0001888   | 1890 | 2205 |

|         |           |      |      |
|---------|-----------|------|------|
| 0.06694 | 0.0001678 | 1890 | 2205 |
| 0.06484 | 0.0005078 | 1890 | 2205 |
| 0.01404 | 0.645     | 1890 | 2205 |
| 0.0152  | 0.532     | 946  | 2167 |
| 0.0609  | 0.0002059 | 946  | 2167 |
| 0.02834 | 0.5398    | 1890 | 2205 |
| 0.03074 | 0.6483    | 946  | 2167 |
| 0.01211 | 0.356     | 1890 | 2205 |
| 0.01307 | 0.7674    | 946  | 2167 |
| 0.01077 | 0.3167    | 1890 | 2205 |
| 0.01165 | 0.6412    | 946  | 2167 |
| 0.01883 | 0.5778    | 1890 | 2205 |
| 0.02021 | 0.8928    | 946  | 2167 |
| 0.0589  | 0.0003026 | 1890 | 2205 |
| 0.04101 | 0.4903    | 1890 | 2205 |
| 0.04399 | 0.3273    | 946  | 2167 |
| 0.01068 | 0.2266    | 1890 | 2205 |
| 0.01158 | 0.3422    | 946  | 2167 |
| 0.01068 | 0.2307    | 1890 | 2205 |
| 0.01158 | 0.349     | 946  | 2167 |
| 0.01089 | 0.5433    | 1890 | 2205 |
| 0.0118  | 0.4207    | 946  | 2167 |
| 0.03541 | 0.5483    | 1890 | 2205 |
| 0.03834 | 0.2807    | 946  | 2167 |
| 0.04009 | 0.05203   | 1890 | 2205 |
| 0.04218 | 0.6704    | 946  | 2167 |
| 0.03485 | 0.0008301 | 1890 | 2205 |
| 0.03482 | 0.0008202 | 1890 | 2205 |
| 0.03482 | 0.0008186 | 1890 | 2205 |
| 0.0348  | 0.0008132 | 1890 | 2205 |
| 0.03478 | 0.000808  | 1890 | 2205 |
| 0.09607 | 0.0005418 | 946  | 2167 |
| 0.01855 | 0.0007633 | 946  | 2167 |
| 0.07513 | 0.0008989 | 1890 | 2205 |
| 0.01079 | 0.05637   | 1890 | 2205 |
| 0.01167 | 0.1968    | 946  | 2167 |
| 0.01136 | 0.07038   | 1890 | 2205 |
| 0.01226 | 0.269     | 946  | 2167 |
| 0.03162 | 0.0009684 | 946  | 2167 |
| 0.03166 | 0.000939  | 946  | 2167 |
| 0.02057 | 0.008003  | 1890 | 2205 |
| 0.02186 | 0.002427  | 946  | 2167 |
| 0.03774 | 0.0004307 | 1890 | 2205 |
| 0.02179 | 0.0006722 | 946  | 2167 |
| 0.01141 | 0.0008    | 1890 | 2205 |
| 0.02061 | 0.003624  | 1890 | 2205 |
| 0.02196 | 0.001563  | 946  | 2167 |
| 0.01129 | 0.0001938 | 1890 | 2205 |

|         |            |      |      |
|---------|------------|------|------|
| 0.01135 | 0.0003304  | 1890 | 2205 |
| 0.01136 | 0.0001123  | 1890 | 2205 |
| 0.01136 | 0.0001117  | 1890 | 2205 |
| 0.01134 | 0.0000226  | 1890 | 2205 |
| 0.01216 | 0.0006655  | 946  | 2167 |
| 0.01072 | 0.6005     | 1890 | 2205 |
| 0.01152 | 0.8023     | 946  | 2167 |
| 0.01084 | 0.7848     | 1890 | 2205 |
| 0.01169 | 0.6154     | 946  | 2167 |
| 0.03565 | 0.0009883  | 1890 | 2205 |
| 0.03467 | 0.0008672  | 1890 | 2205 |
| 0.03386 | 0.000267   | 1890 | 2205 |
| 0.03338 | 0.0002797  | 1890 | 2205 |
| 0.03435 | 0.0004391  | 1890 | 2205 |
| 0.03426 | 0.0002747  | 1890 | 2205 |
| 0.03797 | 0.0007468  | 946  | 2167 |
| 0.03487 | 0.0001534  | 1890 | 2205 |
| 0.0386  | 0.0004477  | 946  | 2167 |
| 0.03517 | 0.0001036  | 1890 | 2205 |
| 0.03889 | 0.0003451  | 946  | 2167 |
| 0.03532 | 0.00007751 | 1890 | 2205 |
| 0.03903 | 0.0003035  | 946  | 2167 |
| 0.03536 | 0.00008008 | 1890 | 2205 |
| 0.03906 | 0.0003103  | 946  | 2167 |
| 0.03533 | 0.00006783 | 1890 | 2205 |
| 0.03904 | 0.000286   | 946  | 2167 |
| 0.03527 | 0.00006539 | 1890 | 2205 |
| 0.03898 | 0.0002836  | 946  | 2167 |
| 0.01095 | 0.01634    | 1890 | 2205 |
| 0.0118  | 0.02143    | 946  | 2167 |
| 0.01253 | 0.5083     | 1890 | 2205 |
| 0.01366 | 0.8676     | 946  | 2167 |
| 0.09844 | 0.0006014  | 1890 | 2205 |
| 0.09834 | 0.0005811  | 1890 | 2205 |
| 0.09832 | 0.0005777  | 1890 | 2205 |
| 0.1008  | 0.0004258  | 1890 | 2205 |
| 0.1009  | 0.0003703  | 1890 | 2205 |
| 0.1016  | 0.0003802  | 1890 | 2205 |
| 0.0203  | 0.00002835 | 1890 | 2205 |
| 0.02222 | 0.0003966  | 946  | 2167 |
| 0.01722 | 0.0005024  | 1890 | 2205 |
| 0.01722 | 0.000206   | 1890 | 2205 |
| 0.01079 | 0.00001146 | 1890 | 2205 |
| 0.01169 | 0.0002665  | 946  | 2167 |
| 0.02402 | 0.00066    | 1890 | 2205 |
| 0.02238 | 0.00009479 | 1890 | 2205 |
| 0.02367 | 0.0005853  | 946  | 2167 |
| 0.2724  | 0.2353     | 1890 | 2205 |

|         |           |      |      |
|---------|-----------|------|------|
| 0.3964  | 0.4957    | 946  | 2167 |
| 0.01203 | 0.4844    | 1890 | 2205 |
| 0.01279 | 0.8672    | 946  | 2167 |
| 0.01083 | 0.3934    | 1890 | 2205 |
| 0.0115  | 0.02246   | 946  | 2167 |
| 0.01926 | 0.1332    | 1890 | 2205 |
| 0.02071 | 0.001844  | 946  | 2167 |
| 0.1406  | 0.0001929 | 1890 | 2205 |
| 0.1395  | 0.0001809 | 1890 | 2205 |
| 0.1287  | 0.0002454 | 1890 | 2205 |
| 0.131   | 0.0001217 | 1890 | 2205 |
| 0.1298  | 0.0001132 | 1890 | 2205 |
| 0.1295  | 0.000112  | 1890 | 2205 |
| 0.01779 | 0.03437   | 1890 | 2205 |
| 0.01903 | 0.049     | 946  | 2167 |
| 0.01113 | 0.4291    | 1890 | 2205 |
| 0.01198 | 0.1837    | 946  | 2167 |
| 0.01381 | 0.0004097 | 946  | 2167 |
| 0.01887 | 0.104     | 1890 | 2205 |
| 0.02016 | 0.06936   | 946  | 2167 |
| 0.01421 | 0.0005548 | 946  | 2167 |
| 0.05111 | 0.0003671 | 946  | 2167 |
| 0.01153 | 0.0001347 | 946  | 2167 |
| 0.01154 | 0.0001351 | 946  | 2167 |
| 0.01168 | 0.000214  | 946  | 2167 |
| 0.01145 | 0.0001314 | 946  | 2167 |
| 0.01146 | 0.0001329 | 946  | 2167 |
| 0.01143 | 0.0008943 | 946  | 2167 |
| 0.01444 | 0.0009028 | 946  | 2167 |
| 0.01148 | 0.0007452 | 946  | 2167 |
| 0.01144 | 0.0003816 | 946  | 2167 |
| 0.01143 | 0.0003177 | 946  | 2167 |
| 0.01144 | 0.0003689 | 946  | 2167 |
| 0.01155 | 0.0005764 | 946  | 2167 |
| 0.01169 | 0.0007898 | 946  | 2167 |
| 0.01077 | 0.07481   | 1890 | 2205 |
| 0.0116  | 0.3548    | 946  | 2167 |
| 0.01331 | 0.007112  | 1890 | 2205 |
| 0.01437 | 0.0263    | 946  | 2167 |
| 0.1024  | 0.0007781 | 1890 | 2205 |
| 0.06198 | 0.0005954 | 1890 | 2205 |
| 0.06201 | 0.000925  | 1890 | 2205 |
| 0.06678 | 0.000827  | 1890 | 2205 |



**EAF\_CASE**

0.985527  
0.9909817  
0.987719  
0.87056  
0.86915  
0.05831  
0.09259  
0.22856  
0.22245  
0.24126  
0.24138  
0.09305  
0.097  
0.0952  
0.14741  
0.14215  
0.09215  
0.10752  
0.10752  
0.10752  
0.10752  
0.09782  
0.09576  
0.09286  
0.10477  
0.10349  
0.09803  
0.096  
0.12841  
0.12403  
0.09434  
0.09327  
0.29187  
0.28121  
0.09831  
0.09625  
0.09459  
0.09355  
0.09123  
0.09349  
0.09501  
0.13379  
0.12912  
0.12962  
0.12504  
0.09431  
0.17331

**EAF\_CTRL**

0.9928828  
0.9962728  
0.9938735  
0.87876  
0.87907  
0.03998  
0.06752  
0.2032  
0.20403  
0.21108  
0.21167  
0.0677  
0.07044  
0.07028  
0.12574  
0.12673  
0.06749  
0.08096  
0.08096  
0.08096  
0.08097  
0.07134  
0.07117  
0.06813  
0.08003  
0.07988  
0.07152  
0.07135  
0.09692  
0.09645  
0.06887  
0.06838  
0.26523  
0.26653  
0.07171  
0.07154  
0.06904  
0.06852  
0.0683  
0.06851  
0.06955  
0.10155  
0.10118  
0.09811  
0.09767  
0.06925  
0.14589

|           |            |
|-----------|------------|
| 0.09581   | 0.07006    |
| 0.093     | 0.06987    |
| 0.09581   | 0.07006    |
| 0.09301   | 0.06987    |
| 0.09582   | 0.07007    |
| 0.09302   | 0.06988    |
| 0.09582   | 0.07008    |
| 0.09302   | 0.06989    |
| 0.09582   | 0.07008    |
| 0.09303   | 0.06989    |
| 0.09582   | 0.07008    |
| 0.09303   | 0.06989    |
| 0.0948    | 0.06942    |
| 0.09269   | 0.06919    |
| 0.09988   | 0.07317    |
| 0.0982    | 0.07303    |
| 0.13164   | 0.10073    |
| 0.12728   | 0.10033    |
| 0.09432   | 0.0692     |
| 0.09196   | 0.0691     |
| 0.09979   | 0.07379    |
| 0.09817   | 0.07366    |
| 0.13123   | 0.10068    |
| 0.12699   | 0.10029    |
| 0.13108   | 0.10071    |
| 0.12689   | 0.10031    |
| 0.84915   | 0.87681    |
| 0.84913   | 0.87677    |
| 0.84829   | 0.87541    |
| 0.85015   | 0.87772    |
| 0.85028   | 0.87785    |
| 0.85105   | 0.8786     |
| 0.8555    | 0.88153    |
| 0.85542   | 0.88153    |
| 0.85539   | 0.88156    |
| 0.85532   | 0.88162    |
| 0.85504   | 0.88161    |
| 0.85503   | 0.88163    |
| 0.85488   | 0.88159    |
| 0.85498   | 0.88168    |
| 0.9974132 | 0.99989887 |
| 0.950763  | 0.966737   |
| 0.950922  | 0.966484   |
| 0.950894  | 0.966295   |
| 0.951289  | 0.966629   |
| 0.951754  | 0.966593   |
| 0.77575   | 0.74588    |
| 0.76761   | 0.73908    |

|           |           |
|-----------|-----------|
| 0.76743   | 0.73902   |
| 0.96379   | 0.979931  |
| 0.982062  | 0.964675  |
| 0.963698  | 0.980245  |
| 0.963757  | 0.980315  |
| 0.982751  | 0.966007  |
| 0.963735  | 0.980393  |
| 0.983154  | 0.96694   |
| 0.983425  | 0.967416  |
| 0.983649  | 0.967859  |
| 0.967106  | 0.985163  |
| 0.967351  | 0.984974  |
| 0.983569  | 0.968197  |
| 0.973051  | 0.988448  |
| 0.97295   | 0.988329  |
| 0.982708  | 0.96771   |
| 0.982699  | 0.967704  |
| 0.982692  | 0.967701  |
| 0.97304   | 0.988457  |
| 0.972921  | 0.988341  |
| 0.972735  | 0.988196  |
| 0.972329  | 0.988077  |
| 0.981981  | 0.967267  |
| 0.977689  | 0.966188  |
| 0.981843  | 0.966269  |
| 0.972725  | 0.98819   |
| 0.972311  | 0.988072  |
| 0.8198    | 0.80698   |
| 0.81947   | 0.80722   |
| 0.9982548 | 0.9947401 |
| 0.83142   | 0.79212   |
| 0.66256   | 0.69748   |
| 0.64294   | 0.68075   |
| 0.64813   | 0.68385   |
| 0.64403   | 0.6869    |
| 0.63837   | 0.68761   |
| 0.6249    | 0.66905   |
| 0.62009   | 0.67029   |
| 0.935332  | 0.953942  |
| 0.82479   | 0.79446   |
| 0.83134   | 0.79434   |
| 0.79618   | 0.7678    |
| 0.80545   | 0.76748   |
| 0.87229   | 0.84633   |
| 0.87705   | 0.84568   |
| 0.87926   | 0.83695   |
| 0.9918656 | 0.9970921 |
| 0.9908794 | 0.9969846 |

|            |           |
|------------|-----------|
| 0.989748   | 0.9964413 |
| 0.989667   | 0.9960907 |
| 0.83031    | 0.82038   |
| 0.83318    | 0.81962   |
| 0.982918   | 0.9937503 |
| 0.934287   | 0.934415  |
| 0.934967   | 0.934134  |
| 0.76724    | 0.75723   |
| 0.76609    | 0.75955   |
| 0.54639    | 0.56917   |
| 0.54987    | 0.57143   |
| 0.916861   | 0.914788  |
| 0.915862   | 0.914943  |
| 0.988917   | 0.9943066 |
| 0.981184   | 0.981746  |
| 0.980149   | 0.981888  |
| 0.61074    | 0.61801   |
| 0.60826    | 0.61777   |
| 0.61074    | 0.61791   |
| 0.60832    | 0.61767   |
| 0.6164     | 0.61127   |
| 0.6192     | 0.61046   |
| 0.979706   | 0.977434  |
| 0.982914   | 0.977272  |
| 0.98652    | 0.97918   |
| 0.985357   | 0.980198  |
| 0.984084   | 0.970952  |
| 0.984099   | 0.970956  |
| 0.984101   | 0.970955  |
| 0.984109   | 0.970955  |
| 0.984115   | 0.970954  |
| 0.99984461 | 0.9949109 |
| 0.89303    | 0.8611    |
| 0.9919836  | 0.9977794 |
| 0.38817    | 0.36565   |
| 0.37917    | 0.36491   |
| 0.63652    | 0.66001   |
| 0.64592    | 0.6605    |
| 0.978015   | 0.961346  |
| 0.978067   | 0.961388  |
| 0.06574    | 0.08569   |
| 0.05809    | 0.08648   |
| 0.971086   | 0.98069   |
| 0.05895    | 0.0929    |
| 0.7385     | 0.69881   |
| 0.934997   | 0.910934  |
| 0.942459   | 0.910295  |
| 0.27144    | 0.31903   |

|            |           |
|------------|-----------|
| 0.73184    | 0.68809   |
| 0.26854    | 0.31384   |
| 0.26855    | 0.31386   |
| 0.26231    | 0.3079    |
| 0.26212    | 0.3073    |
| 0.35814    | 0.34889   |
| 0.357      | 0.35013   |
| 0.67044    | 0.6613    |
| 0.67474    | 0.66097   |
| 0.970044   | 0.980117  |
| 0.968788   | 0.980182  |
| 0.966431   | 0.97928   |
| 0.965338   | 0.978102  |
| 0.968358   | 0.980971  |
| 0.967431   | 0.980602  |
| 0.965705   | 0.980507  |
| 0.967765   | 0.981068  |
| 0.966059   | 0.980982  |
| 0.968364   | 0.981666  |
| 0.96677    | 0.98159   |
| 0.968057   | 0.981596  |
| 0.966579   | 0.981544  |
| 0.96779    | 0.981378  |
| 0.966362   | 0.981373  |
| 0.967653   | 0.9814    |
| 0.966223   | 0.981362  |
| 0.967448   | 0.981304  |
| 0.96604    | 0.981272  |
| 0.38651    | 0.36119   |
| 0.39291    | 0.36217   |
| 0.24047    | 0.23366   |
| 0.23415    | 0.23476   |
| 0.9989521  | 0.9949454 |
| 0.9989735  | 0.9949465 |
| 0.9989759  | 0.9949458 |
| 0.99953757 | 0.9953902 |
| 0.99949762 | 0.9952937 |
| 0.9995254  | 0.9953404 |
| 0.908721   | 0.932696  |
| 0.907533   | 0.93243   |
| 0.86985    | 0.88831   |
| 0.87489    | 0.89833   |
| 0.4318     | 0.47348   |
| 0.43092    | 0.47393   |
| 0.959249   | 0.945498  |
| 0.94594    | 0.927251  |
| 0.948265   | 0.927342  |
| 0.9980545  | 0.9985268 |

|            |            |
|------------|------------|
| 0.9983118  | 0.9985044  |
| 0.32977    | 0.31923    |
| 0.31584    | 0.32024    |
| 0.51514    | 0.50185    |
| 0.53591    | 0.50157    |
| 0.88148    | 0.86995    |
| 0.902948   | 0.8696     |
| 0.9968566  | 0.99967392 |
| 0.9968251  | 0.99967551 |
| 0.9964048  | 0.99944059 |
| 0.9965899  | 0.99968866 |
| 0.9965614  | 0.99970181 |
| 0.9965553  | 0.99970454 |
| 0.89704    | 0.87706    |
| 0.902355   | 0.87749    |
| 0.46508    | 0.48281    |
| 0.45465    | 0.48237    |
| 0.79193    | 0.74986    |
| 0.910294   | 0.89383    |
| 0.916202   | 0.89441    |
| 0.25863    | 0.22685    |
| 0.977014   | 0.98955    |
| 0.67278    | 0.62508    |
| 0.67276    | 0.62508    |
| 0.68222    | 0.63662    |
| 0.66781    | 0.62062    |
| 0.66881    | 0.62118    |
| 0.66288    | 0.62323    |
| 0.82397    | 0.78885    |
| 0.6426     | 0.59778    |
| 0.62923    | 0.58299    |
| 0.62908    | 0.58242    |
| 0.62887    | 0.58246    |
| 0.63582    | 0.59113    |
| 0.67099    | 0.63141    |
| 0.54913    | 0.52943    |
| 0.54282    | 0.52969    |
| 0.83014    | 0.80657    |
| 0.83156    | 0.80726    |
| 0.99964471 | 0.995341   |
| 0.9959278  | 0.989451   |
| 0.9955728  | 0.989335   |
| 0.9964862  | 0.9907558  |
