# Supplementary material
Source: PubMed Central journal article supplement (PMC6309605)

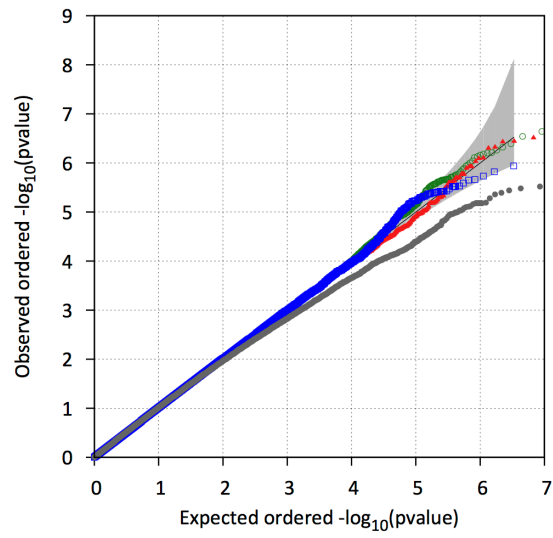

|                           |   |
|---------------------------|---|
| MAF [.05,.5] (9145587)    | ○ |
| MAF [.01,.05] (6815601)   | ▲ |
| MAF [.005,.01] (3366217)  | □ |
| MAF [.001,.005] (8619649) | • |

Supplement: NIHMS1510203-supplement-1.pdf [file NIHMS1510203-supplement-1.pdf]
